# Supplementary material for: Rapid determination of the original boron isotopic composition from altered basaltic glass by in situ secondary ion mass spectrometry
Source: Royal Society of Chemistry journal article supplement (doi:10.1039/c9ja00374f), 2019-12-06
Supplement: c9ja00374f1.xlsx [file c9ja00374f1.xlsx]

## Sheet: different session for BCR-2G
	Session 1				Session 2				Session 3
		11B/10B	SEM (%)			11B/10B	SEM (%)			11B/10B	SEM (%)
	BCR-2G@01	3.90999	0.0698594		BCR-2G@01	3.9243	0.0671908		BCR-2G@01	3.91638	0.0785048
	BCR-2G@02	3.90941	0.0688042		BCR-2G@02	3.92216	0.0617711		BCR-2G@02	3.91568	0.0679499
	BCR-2G@03	3.9082	0.0762459		BCR-2G@03	3.92641	0.0799823		BCR-2G@03	3.91167	0.0628279
	BCR-2G@04	3.91193	0.0660019		BCR-2G@04	3.91988	0.0629587		BCR-2G@04	3.91811	0.057092
	BCR-2G@05	3.91406	0.0653237		BCR-2G@05	3.9225	0.0675196		BCR-2G@05	3.92297	0.0585395
	BCR-2G@06	3.90921	0.0679067		BCR-2G@06	3.9249	0.0645433		BCR-2G@06	3.91427	0.0581776
	BCR-2G@07	3.91021	0.0678076		BCR-2G@07	3.92443	0.0688512		BCR-2G@07	3.91959	0.0647772
	BCR-2G@08	3.91103	0.062891		BCR-2G@08	3.92043	0.0633144		BCR-2G@08	3.91541	0.0621334
	BCR-2G@09	3.90898	0.0687278		BCR-2G@09	3.9253	0.062621		BCR-2G@09	3.91746	0.077515
	BCR-2G@10	3.90894	0.0727059		BCR-2G@10	3.9182	0.0719221		BCR-2G@10	3.91539	0.0566084
	BCR-2G@11	3.91073	0.0683569		BCR-2G@11	3.91806	0.0674878		BCR-2G@11	3.91734	0.056718
	BCR-2G@12	3.91084	0.0620046		BCR-2G@12	3.92402	0.0743833		BCR-2G@12	3.91453	0.0645368
	BCR-2G@13	3.91143	0.0818052		BCR-2G@13	3.92268	0.0770113		BCR-2G@13	3.91686	0.0881008
	BCR-2G@14	3.91653	0.0685093		BCR-2G@14	3.92119	0.0657957		BCR-2G@14	3.91355	0.0715543
	BCR-2G@15	3.91261	0.0624041		BCR-2G@15	3.92511	0.0655634		BCR-2G@15	3.9157	0.0676865
	BCR-2G@16	3.9106	0.0619375		BCR-2G@16	3.92046	0.0565897		BCR-2G@16	3.91717	0.0632986
	BCR-2G@17	3.91432	0.0629314		BCR-2G@17	3.92351	0.0581115		BCR-2G@17	3.91167	0.0766906
	BCR-2G@18	3.90804	0.0660559		BCR-2G@18	3.92041	0.0592896
	BCR-2G@19	3.91136	0.064292		BCR-2G@19	3.92453	0.059833
	BCR-2G@20	3.91266	0.0655344		BCR-2G@20	3.92345	0.0624822
	BCR-2G@21	3.90991	0.0663533
	BCR-2G@22	3.90622	0.0656164
	BCR-2G@23	3.91022	0.0699912
	BCR-2G@24	3.9139	0.0740152
	BCR-2G@25	3.90975	0.078106
	BCR-2G@26	3.91171	0.0663218
	BCR-2G@27	3.91195	0.0661379

## Sheet: composition of altered glass
		Measured by SIMS
	Location	δ11B (‰)	SEM (‰)		B content (ppm)	SEM (‰)
Slightly altered glass	1	-9.8559	1.50392		2.06101	0.000163007
	2	-8.99318	1.48992		2.07709	0.00016773
	3	-12.004	1.7612		2.07819	0.00016052
	4	-9.49307	1.48351		2.0929	0.000137824
	5	-3.31358	1.8443		1.68286	0.000182498
	6	₊+0.88356	4.39191		1.06012	0.000865504
	7	₊+9.56272	2.55641		1.31085	0.00318
	8	₊+5.8919	0.8489		48.4978	0.00602
	9	₊+8.56416	0.72746		87.7667	0.00387
	10	₊+5.04384	0.32777		127.127	0.00167
Extensively altered glass	1	-6.92171	1.63879		2.00858	0.000196627
	2	-4.99821	1.73565		1.81223	0.0053
	3	-3.82963	1.69241		1.80666	0.00050101
	4	₊+0.71611	2.49148		1.40597	0.00132
	5	₊+7.91483	2.86089		1.21092	0.0014
	6	₊+9.30444	0.83013		8.99538	0.00649
	7	₊+5.64125	0.32275		51.8744	0.00434
	8	₊+3.22493	0.52357		100.967	0.00293
	9	₊+6.85307	0.32085		130.515	0.00166
	10	₊+4.89085	0.38591		123.717	0.00172

## Sheet: MC-ICPMS data
		Measured by MC-ICPMS			Reference value		Measured by SIMS (Iprim=100 nA)
		δ11B (‰)	mean δ11B (‰)	1σ (‰)	δ11B (‰)		mean δ11B (‰)	1σ (‰)
	BCR-2	-5.68	-5.76	0.11	-5.9±0.1(σ)
		-5.83			(Wei, et al, 2013)
	BCR-2G	-5.43	-5.435	0.28	—		-5.44	0.64
		-5.08
		-5.76
		-5.47
	BHVO-2G	-2.53	-1.8225	0.48	—		-4.07	0.97
		-1.65
		-1.51
		-1.6
	BIR-1G	-0.8	-1.135	0.49736			-4.1	1.31
		-1.66
		-0.63
		-1.45
	Palagonite	₊4.89	₊+5.75	0.75	-2.4~+17.3		₊+4.25	1.6
		₊6.1			(Pauly, et al., 2014)
		₊6.26
